# Supplementary material
Source: HighWire-hosted journal article supplement (https://bmjopen.bmj.com/content/9/2/e026121)
Supplement: inline-supplementary-material-1 [file inline-supplementary-material-1.pdf]

## Supplemental file 1. Data extracted from included studies

### Cardiac rehabilitation or cardiovascular disease

| Study                         | Research design                                              | Objective                                        | PCC term        | PCC definition or measurement                                                                                                                                                                                     | Findings                                                                                                                                                                                                                                                                                                           |
|-------------------------------|--------------------------------------------------------------|--------------------------------------------------|-----------------|-------------------------------------------------------------------------------------------------------------------------------------------------------------------------------------------------------------------|--------------------------------------------------------------------------------------------------------------------------------------------------------------------------------------------------------------------------------------------------------------------------------------------------------------------|
| Esmaeili 2016<br>Iran<br>(25) | Qualitative interviews with 18 cardiac inpatients (10 women) | Explore patient views about patient-centred care | Patient-centred | Acknowledged the lack of a standard definition of patient-centred care, though noted it included treating patients with great respect, involving them in healthcare decision-making, and acknowledging their need | Patient views about components of patient-centred care:<br>Managing patient's uncertainty<br>Providing flexible care that addressed patient needs, expectations and preferences<br>Empathizing with patients<br>Making informed, shared/independent decisions about care<br>Establishing therapeutic communication |

### Preventive Care

| Study                               | Research design                                                                                                                              | Objective                                                                                                                                                                                                                          | PCC term        | PCC definition or measurement                                                                                                                                                                                                                                                                                                                                                                                                                                                                                                                                                                                                                                                                                                                                                                                                                       | Findings                                                                                                                                                                                                                                                                        |
|-------------------------------------|----------------------------------------------------------------------------------------------------------------------------------------------|------------------------------------------------------------------------------------------------------------------------------------------------------------------------------------------------------------------------------------|-----------------|-----------------------------------------------------------------------------------------------------------------------------------------------------------------------------------------------------------------------------------------------------------------------------------------------------------------------------------------------------------------------------------------------------------------------------------------------------------------------------------------------------------------------------------------------------------------------------------------------------------------------------------------------------------------------------------------------------------------------------------------------------------------------------------------------------------------------------------------------------|---------------------------------------------------------------------------------------------------------------------------------------------------------------------------------------------------------------------------------------------------------------------------------|
| Liang 2017<br>United States<br>(26) | Analysis of survey data for 16,654 patients aged 65+ with at least one chronic condition collected from 2009-2013 (56% women, mean age 74.3) | Examine association between patient-centred care and receipt of preventive services: blood pressure, blood cholesterol, routine checkup, blood stool test, breast exam, mammography, Pap smear, exercise education, diet education | Patient-centred | <p>Patient-centred care (PCC) assessed by 9 survey questions (based on Institute of Medicine definition of PCC):</p> <p><u>Whole-person care</u></p> <ul style="list-style-type: none"> <li>• Confidence in provider for new and minor health problems</li> <li>• Confidence in provider for preventive care</li> <li>• Confidence in provider for ongoing health problems</li> <li>• Confidence in provider for referrals to other health professionals</li> </ul> <p><u>Patient engagement</u></p> <ul style="list-style-type: none"> <li>• Asks about medication/treatment from other providers</li> <li>• Asks patient to be involved in decisions</li> </ul> <p><u>Enhanced access to care</u></p> <ul style="list-style-type: none"> <li>• No difficulty accessing provider by phone</li> <li>• Provider has evening/weekend hours</li> </ul> | <ul style="list-style-type: none"> <li>• The PCC group was more likely than the non-PCC group to receive 8 types of preventive services</li> <li>• The partial PCC group had a greater likelihood than the non-PCC group of receiving 7 types of preventive services</li> </ul> |

|                                |                                                                                                        |                                                                                                               |                 |                                                                                                                                                                                                                                                                                                                                                                                  |                                                                                                                                                                                                                                                                                                                                                                   |
|--------------------------------|--------------------------------------------------------------------------------------------------------|---------------------------------------------------------------------------------------------------------------|-----------------|----------------------------------------------------------------------------------------------------------------------------------------------------------------------------------------------------------------------------------------------------------------------------------------------------------------------------------------------------------------------------------|-------------------------------------------------------------------------------------------------------------------------------------------------------------------------------------------------------------------------------------------------------------------------------------------------------------------------------------------------------------------|
|                                |                                                                                                        |                                                                                                               |                 | <ul style="list-style-type: none"> <li>• No difficulty accessing provider after hours</li> </ul>                                                                                                                                                                                                                                                                                 |                                                                                                                                                                                                                                                                                                                                                                   |
| Peters 2010 Australia (27)     | Qualitative interviews with 15 women aged 30-65                                                        | Explore factors influencing decisions about routine Pap testing or mammography                                | Woman-centred   | <p>Factors identified by women and labelled as woman-centred by authors were:</p> <ul style="list-style-type: none"> <li>• Access to female physician</li> <li>• Holistic care; either due to time to discuss various issues or access to multidisciplinary team</li> <li>• Woman-only environment</li> <li>• Opportunity to ask questions and have testing explained</li> </ul> | <p>Factors that influenced routine screening:</p> <ul style="list-style-type: none"> <li>• Safe environment</li> <li>• Continuity of care</li> <li>• Woman-centred service</li> </ul>                                                                                                                                                                             |
| Lasser 2008 United States (28) | Qualitative observation of 7 primary care providers and 18 elderly patients (78% women, mean age 71.9) | Explore influence of patient-centred communication on agreeing to flu vaccine and colorectal cancer screening | Patient-centred | <p>Patient-centred communication was described by the authors as:</p> <ul style="list-style-type: none"> <li>• Sharing of power and responsibility</li> <li>• Use of empathy</li> <li>• Treating patient like a person</li> <li>• Rapport and trust</li> </ul>                                                                                                                   | <p>Factors influencing preventive services were:</p> <ul style="list-style-type: none"> <li>• Primary care provider vaccination of the patient</li> <li>• Primary care provide introduces the discussion</li> <li>• Persistence of primary care provider</li> <li>• Primary care provider cultural competence</li> <li>• Patient-centred communication</li> </ul> |

### Family planning

| Study                             | Research design                                | Objective                                                            | PCC term        | PCC definition or measurement                                                                                                                                                                                                                                                                | Findings                                                                                                                                                                                                                                                                                                                                                                                                                                                           |
|-----------------------------------|------------------------------------------------|----------------------------------------------------------------------|-----------------|----------------------------------------------------------------------------------------------------------------------------------------------------------------------------------------------------------------------------------------------------------------------------------------------|--------------------------------------------------------------------------------------------------------------------------------------------------------------------------------------------------------------------------------------------------------------------------------------------------------------------------------------------------------------------------------------------------------------------------------------------------------------------|
| Callegari 2017 United States (29) | Concept analysis (review of select literature) | To describe a patient-centred approach to reproductive life planning | Patient-centred | Authors described a patient-centred approach as providing education to patients that integrates evidence-based recommendations with patient preferences, recognizing that patients' individual values and preferences should be an integral factor in decisions made about their health care | <p>Components of a patient-centred approach:</p> <ul style="list-style-type: none"> <li>• Asking open-ended questions that allow women to express ambivalent or mixed feelings about pregnancy</li> <li>• Working collaboratively with women to identify strategies that meet their needs in the setting of ambivalence</li> <li>• Recognizing that some women who do not have an active intention to pursue pregnancy may welcome unintended pregnancy</li> </ul> |

|                                    |                                                                             |                                                                                                                   |                 |                                                                                                                                                                                                                                                                                                                                                                                                                                                                                                                                                   |                                                                                                                                                                                                                                                                                                                                                                                                                              |
|------------------------------------|-----------------------------------------------------------------------------|-------------------------------------------------------------------------------------------------------------------|-----------------|---------------------------------------------------------------------------------------------------------------------------------------------------------------------------------------------------------------------------------------------------------------------------------------------------------------------------------------------------------------------------------------------------------------------------------------------------------------------------------------------------------------------------------------------------|------------------------------------------------------------------------------------------------------------------------------------------------------------------------------------------------------------------------------------------------------------------------------------------------------------------------------------------------------------------------------------------------------------------------------|
|                                    |                                                                             |                                                                                                                   |                 |                                                                                                                                                                                                                                                                                                                                                                                                                                                                                                                                                   | <ul style="list-style-type: none"> <li>• Recognizing that some women may not value planning, or may feel that planning is not attainable due to their life circumstances</li> <li>• Providing nonjudgmental counseling and support, which respects women's reproductive autonomy</li> <li>• Tailoring information delivery to women's preferences and needs, based on open conversations about reproductive goals</li> </ul> |
| Morse 2017 United States (30)      | Concept analysis (review of select literature)                              | To describe a patient-centred approach to family planning                                                         | Patient-centred | <p>Authors describe a patient-centred approach as:</p> <ul style="list-style-type: none"> <li>• Putting women at the forefront to optimize reproductive choices</li> <li>• Understanding patients' cultural, ethnic, racial and social background</li> <li>• Non-coercive</li> </ul>                                                                                                                                                                                                                                                              | <p>Components of a patient-centred approach:</p> <ul style="list-style-type: none"> <li>• Establish continuity of care</li> <li>• Earn patient trust</li> <li>• Acknowledge different values around childbearing</li> <li>• Inquire about reproductive preferences</li> <li>• Ask about patient contraceptive preferences</li> <li>• Talk about proper use of contraceptive methods</li> </ul>                               |
| Dehlendorf 2016 United States (31) | Analysis of survey data from 348 women (mean age 26.8 years) from 2009-2012 | Assess whether quality of interpersonal care during contraceptive counseling is associated with contraceptive use | Patient-centred | <p>Interpersonal Quality in Family Planning scale developed for this study was based on published quality measures reflecting patient-centered care and qualitative research on women's preferences for contraceptive counseling:</p> <ul style="list-style-type: none"> <li>• Respecting me as a person</li> <li>• Showing care and compassion</li> <li>• Letting me say what mattered about my birth control method</li> <li>• Giving me opportunity to ask questions</li> <li>• Taking my preferences about birth control seriously</li> </ul> | <ul style="list-style-type: none"> <li>• 41% were still using their chosen contraceptive methods at 6 months</li> <li>• Patients who reported high quality interpersonal care of family planning were more likely to maintain use of chosen contraceptive method (OR 1.8, 95% CI 1.1 to 3.0)</li> </ul>                                                                                                                      |

|                                 |                                                                                                       |                                                                                   |                 |                                                                                                                                                                                                                                                                                                                                                                                                                                                                                          |                                                                                                                                                                                                                                                                                                                                    |
|---------------------------------|-------------------------------------------------------------------------------------------------------|-----------------------------------------------------------------------------------|-----------------|------------------------------------------------------------------------------------------------------------------------------------------------------------------------------------------------------------------------------------------------------------------------------------------------------------------------------------------------------------------------------------------------------------------------------------------------------------------------------------------|------------------------------------------------------------------------------------------------------------------------------------------------------------------------------------------------------------------------------------------------------------------------------------------------------------------------------------|
|                                 |                                                                                                       |                                                                                   |                 | <ul style="list-style-type: none"> <li>• Considering my personal situation when advising about birth control</li> <li>• Working out a plan for birth control with me</li> <li>• Giving me enough information to make the best decision about my birth control method</li> <li>• Telling me how to take or use my birth control method most effectively</li> <li>• Telling me the risks and benefits of the birth control method I chose</li> <li>• Answering all my questions</li> </ul> |                                                                                                                                                                                                                                                                                                                                    |
| Pilgrim 2014 United States (32) | Analysis of survey data from 748 women (mean age 24) attending family planning clinics from 2008-2009 | Examine quality of care and satisfaction with care in family planning programs    | Patient-centred | <p>Client-Clinician Centeredness Scale asks if the clinician:</p> <ul style="list-style-type: none"> <li>• Explained medical words</li> <li>• Encouraged me to ask questions</li> <li>• Gave me enough time to say what I thought was important</li> <li>• Listened carefully to what I had to say</li> <li>• Explained why tests were being done</li> <li>• Made me feel comfortable by talking about personal things</li> <li>• Was interested in me as a person</li> </ul>            | <p>Satisfaction with care was associated with:</p> <ul style="list-style-type: none"> <li>• Convenient clinic hours</li> <li>• Clear check-in process</li> <li>• Clinical aids used during appointment</li> <li>• Higher scores on Client-Clinician Centeredness Scale</li> </ul>                                                  |
| Yee 2011 United States (33)     | Qualitative interviews with 30 postpartum women (mean age 26.6 years)                                 | Explore views about postpartum contraception counseling content and communication | Patient-centred | <p>Features of positive communication labelled by authors as patient-centred:</p> <ul style="list-style-type: none"> <li>• Answering questions</li> <li>• Frequent discussions</li> <li>• Providing written information</li> <li>• Feeling supported</li> <li>• Feeling connected to provider</li> <li>• Provider-initiated counseling</li> <li>• Being allowed to choose</li> </ul>                                                                                                     | <p>Valued features of counseling were:</p> <ul style="list-style-type: none"> <li>• Communication that was personalized, comprehensive and delivered in an empathic manner</li> <li>• Multimodal teaching approach (both discussion and reading material)</li> <li>• Balance of not too much information with reminders</li> </ul> |

## Depression

| Study                                       | Research design                                                                                                   | Objective                                                                                                   | PCC term        | PCC definition or measurement                                                                                                                                                                                                                                                                                                                                                                                                                                                               | Findings                                                                                                                                                                                                                                                                                                                                                                                                                                                                                        |
|---------------------------------------------|-------------------------------------------------------------------------------------------------------------------|-------------------------------------------------------------------------------------------------------------|-----------------|---------------------------------------------------------------------------------------------------------------------------------------------------------------------------------------------------------------------------------------------------------------------------------------------------------------------------------------------------------------------------------------------------------------------------------------------------------------------------------------------|-------------------------------------------------------------------------------------------------------------------------------------------------------------------------------------------------------------------------------------------------------------------------------------------------------------------------------------------------------------------------------------------------------------------------------------------------------------------------------------------------|
| Wang 2017<br>China<br>(34)                  | Analysis of survey data from 291 patients (53.5% women, mean age 49.4) and 71 physicians                          | Examine preferences for patient-centred communication                                                       | Patient-centred | Patient-Practitioner Orientation Scale comprised of 18 items: <ul style="list-style-type: none"> <li>Caring subscale (9 items): physicians should care about the patient as a whole, and caring about emotions and good interpersonal relations are key to the medical encounter</li> <li>Sharing subscale (9 items) – patients and physicians should share power and control, and physicians should share as much information as possible</li> </ul>                                       | <ul style="list-style-type: none"> <li>Physicians scored higher in Caring (4.7 vs 4.08, <math>p&lt;0.05</math>)</li> <li>Patients scored higher in Sharing (3.13 vs 2.94, <math>p&lt;0.05</math>)</li> </ul>                                                                                                                                                                                                                                                                                    |
| Finney Rutten 2016<br>United States<br>(35) | Analysis of survey data from 3,630 adults (54.7% women, 55% age 18-49, 26.4% age 50-64, 18.5% 65+) from 2012-2013 | To examine whether patient-centred communication is associated with self-efficacy by chronic illness burden | Patient-centred | Patient-centred communication questions based on Epstein & Street asked if providers: <ul style="list-style-type: none"> <li>Allowed you to ask all the health-related questions you had</li> <li>Payed attention to feelings and emotions</li> <li>Involved you in decisions as much as you wanted</li> <li>Made sure you understood things you needed to do to take care of your health</li> <li>Helped you deal with feelings of uncertainty about your health or health care</li> </ul> | <ul style="list-style-type: none"> <li>Health-related self-efficacy was lower among those with greater illness burden (11.06, <math>p=0.0002</math>)</li> <li>Those without depression/anxiety had higher health self-efficacy (4.34, <math>p=0.01</math>)</li> <li>Higher ratings of patient-centred communication were associated with health self-efficacy (0.26, <math>p&lt;0.0001</math>), ans was greater among those with depression/anxiety (0.19, <math>p&lt;0.0001</math>)</li> </ul> |
| Rossum 2016<br>United States<br>(36)        | Survey of 792 patients (75.0% women) from 83 primary care clinics from 2007-2009                                  | Examine link between patient-centred care and depression improvement                                        | Patient-centred | Patient Assessment of Chronic Illness Care survey measured how patient-centred, proactive, planned, and collaborative patients found their care: <ul style="list-style-type: none"> <li>Treatment preferences</li> <li>Concerns and questions</li> <li>Clinicians considered your goals and values when recommending treatments</li> </ul>                                                                                                                                                  | <ul style="list-style-type: none"> <li>At 6 months, 37% of 792 patients ages 18–88 achieved depression remission, and 79% rated their care as good-to-excellent</li> <li>Measures of patient-centredness associated with remission at 6 months: asked for ideas and preferences regarding treatment (<math>p=0.04</math>), asked about</li> </ul>                                                                                                                                               |

|                         |                                                                                                                                                                         |                                              |                      |                                                                                                                                                                                                                                                                                                                                                                                                                                                                                                                                                                                                                                                                                                                                                                                                                                                 |                                                                                                                                                                                                                                                                                                                                                                                                                                                                                                                                                                                                                                                                                                |
|-------------------------|-------------------------------------------------------------------------------------------------------------------------------------------------------------------------|----------------------------------------------|----------------------|-------------------------------------------------------------------------------------------------------------------------------------------------------------------------------------------------------------------------------------------------------------------------------------------------------------------------------------------------------------------------------------------------------------------------------------------------------------------------------------------------------------------------------------------------------------------------------------------------------------------------------------------------------------------------------------------------------------------------------------------------------------------------------------------------------------------------------------------------|------------------------------------------------------------------------------------------------------------------------------------------------------------------------------------------------------------------------------------------------------------------------------------------------------------------------------------------------------------------------------------------------------------------------------------------------------------------------------------------------------------------------------------------------------------------------------------------------------------------------------------------------------------------------------------------------|
|                         |                                                                                                                                                                         |                                              |                      | <ul style="list-style-type: none"> <li>• Provided treatment plans you could do in your daily life</li> <li>• Asked about side effects of treatment</li> <li>• Encouraged to attend community programs</li> <li>• Told about changes to make in daily life that could help</li> <li>• Given written information</li> <li>• Referred to a nurse or other clinician who works with the physician to help you</li> <li>• Called by a health professional who works with your physician to follow-up on how treatment was working</li> </ul> <p>Depression severity was self-rated using the PHQ-9 and remission was defined as a score &lt; 5.0</p> <p>Depression care quality was assessed with: over the past month, how would you rate the quality of care you have received for depression at your primary care clinic (excellent to poor)?</p> | <p>concerns or questions (<math>p=0.03</math>), provided with treatment plans (<math>p=0.04</math>), asked to complete a depression screen (<math>p=0.01</math>) and asked about thoughts of suicide or self-harm (<math>p=0.008</math>)</p> <ul style="list-style-type: none"> <li>• Soliciting patient preferences for care and questions or concerns= (<math>0.0001</math>), providing treatment plans (<math>p=0.0002</math>), feeling that providers asked about values and preferences (<math>p&lt;0.0001</math>), utilizing depression scales (<math>p&lt;0.0001</math>) and asking about side effects (<math>p&lt;0.0001</math>) positively associated with quality ratings</li> </ul> |
| Jani 2012 Scotland (37) | Qualitative observation of 356 visits with 25 GPs in deprived areas (107 patients, 67.3% women) and 303 visits with 20 GPs in affluent areas (56 patients, 78.6% women) | Assess if depression care is patient-centred | Patient-centred care | <p>Physician empathy assessed with the Consultation and Relational Empathy (CARE) questionnaire measure:</p> <ul style="list-style-type: none"> <li>• Making you feel at ease</li> <li>• Letting you tell your “story”</li> <li>• Really listening</li> <li>• Being interested in you as a whole person</li> <li>• Fully understanding your concerns</li> <li>• Showing care and compassion</li> <li>• Being positive</li> <li>• Explaining things clearly</li> <li>• Helping you to take control</li> <li>• Making a plan of action with you</li> </ul>                                                                                                                                                                                                                                                                                        | <ul style="list-style-type: none"> <li>• Mean consultation length was similar in deprived and affluent areas</li> <li>• Mean CARE measure was lower in deprived areas (<math>p=0.003</math>) compared with affluent areas</li> <li>• Mean global score of Measure of Patient Centred Communication was lower in deprived areas (<math>p=0.004</math>), as were the components of exploring disease and illness, and finding common ground</li> </ul>                                                                                                                                                                                                                                           |

|                                 |                                                                                                                                      |                                                                             |                 |                                                                                                                                                                                                                                                                                                                                                                                                                                                                                                                                                                                                                                               |                                                                                                                                                                                                                                                                                                                                                                                                                                                                                                                                             |
|---------------------------------|--------------------------------------------------------------------------------------------------------------------------------------|-----------------------------------------------------------------------------|-----------------|-----------------------------------------------------------------------------------------------------------------------------------------------------------------------------------------------------------------------------------------------------------------------------------------------------------------------------------------------------------------------------------------------------------------------------------------------------------------------------------------------------------------------------------------------------------------------------------------------------------------------------------------------|---------------------------------------------------------------------------------------------------------------------------------------------------------------------------------------------------------------------------------------------------------------------------------------------------------------------------------------------------------------------------------------------------------------------------------------------------------------------------------------------------------------------------------------------|
|                                 |                                                                                                                                      |                                                                             |                 | <p>Verbal communication assessed with the Measure of Patient-Centred Communication:</p> <ul style="list-style-type: none"> <li>• Exploring disease and illness experience</li> <li>• Understanding the whole person</li> <li>• Finding common ground</li> </ul> <p>Non-verbal communication assessed with Mehrabian's schemata for number of:</p> <ul style="list-style-type: none"> <li>• Smiles, and their duration</li> <li>• Positive facial expressions</li> <li>• Head nods</li> <li>• Supportive gesticulations</li> <li>• Gaze toward patient, and their duration</li> <li>• Use of computer and notes ,and their duration</li> </ul> | <ul style="list-style-type: none"> <li>• GPs in deprived areas looked at patients for shorter times (<math>p=0.002</math>), had fewer head nods (<math>p=0.001</math>), and fewer positive facial expressions (<math>p=0.013</math>)</li> </ul>                                                                                                                                                                                                                                                                                             |
| Chapman 2008 United States (38) | Qualitative observation of 88 consults with 6 female standardized patients to 46 general practitioners for discussions of depression | Assess link between patient-centred communication and physician personality | Patient-centred | <p>Communication assessed with the Measure of Patient-Centred Communication (MPCC):</p> <ul style="list-style-type: none"> <li>• Exploring disease and illness experience</li> <li>• Understanding the whole person</li> <li>• Finding common ground</li> </ul> <p>Physician personality assessed with NEO Personality Inventory</p> <ul style="list-style-type: none"> <li>• Anxiety</li> <li>• Vulnerability</li> <li>• Tender mindedness</li> <li>• Dutifulness</li> <li>• Openness to feelings</li> </ul>                                                                                                                                 | <ul style="list-style-type: none"> <li>• Physicians who were more open to feelings engaged in greater communication about the patient's illness experience (MPCC component 1; <math>p=0.05</math>)</li> <li>• Higher dutifulness was associated with higher scores on component 2 (whole person; <math>p=.03</math>) but lower scores on component 3 (finding common ground; <math>p=0.02</math>)</li> <li>• Greater anxiety or vulnerability was associated with lower component 3 (common ground) scores (<math>p=0.03</math>)</li> </ul> |
